# Supplementary material for: A large predatory reef fish species moderates feeding and activity patterns in response to seasonal and latitudinal temperature variation
Source: PubMed Central journal article supplement (PMC5636919; doi:10.1038/s41598-017-13277-4), 2017-10-11
Supplement: 41598_2017_13277_MOESM1_ESM.pdf [file 41598_2017_13277_MOESM1_ESM.pdf]

# **A large predatory reef fish species moderates feeding and activity patterns in response to seasonal and latitudinal temperature variation**

Authors:\* Molly Scott<sup>1</sup>, Michelle Heupel<sup>2</sup>, Andrew Tobin<sup>3</sup>, Morgan Pratchett<sup>1</sup>

<sup>1</sup> ARC Centre of Excellence for Coral Reef Studies, James Cook University, Townsville QLD 4811, Australia.

<sup>2</sup> Australian Institute of Marine Science, PMB No 3, Townsville, Queensland 4810, Australia

<sup>3</sup> Centre for Sustainable Tropical Fisheries and Aquaculture and School of Earth and Environmental Sciences, James Cook University, Townsville, Queensland 4811, Australia

\*Corresponding author Molly Scott. (email: [molly.scott@my.jcu.edu.au](mailto:molly.scott@my.jcu.edu.au))

## Supplementary Material

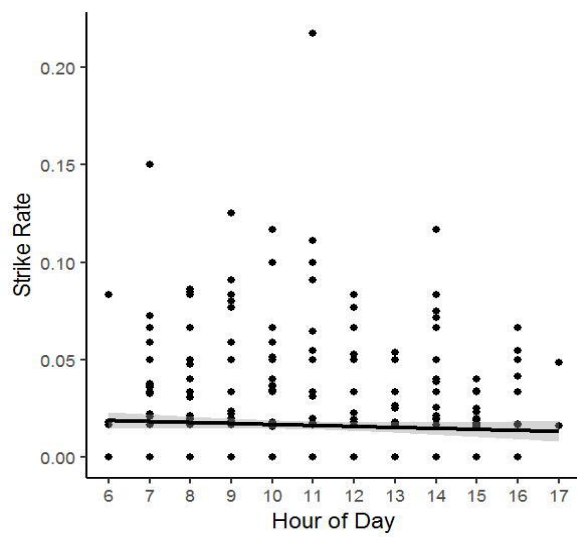

Figure S1: The modelled values of a generalised linear model illustrating that strike rates of *P. leopardus* were not significantly different between hours of the day ( $p = 0.796$ ).

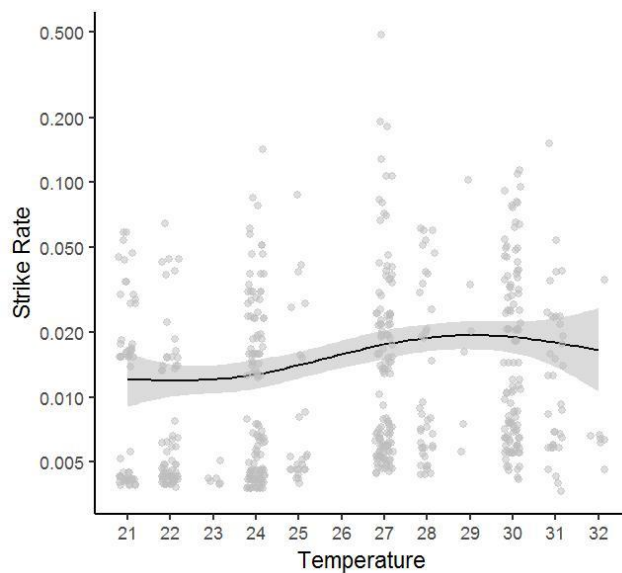

Figure S2: The modelled values of the relationship between strike rate and increasing temperature ( $p < 0.01$ ) from a Generalised Additive Model with a smoothing function. The shaded region around the curve represents a 95% confidence interval, the grey points are residual values from the fitted model and have been jittered to show their variation.
